# Supplementary material for: Chronic-Antibiotics Induced Gut Microbiota Dysbiosis Rescues Memory Impairment and Reduces β-Amyloid Aggregation in a Preclinical Alzheimer’s Disease Model
Source: MDPI journal article supplement (doi:10.3390/ijms23158209), 2022-07-26
Supplement: s1 [file s1]

**Table 7. Spearman Correlation p values for the 22 genera identified in gut microbiota in behavior performance and motor activity.**

| <b>Bacteria</b>              | <b>Exploration<br/>time_Nov</b> | <b>MA<br/>Distance</b> | <b>MA<br/>Resting<br/>Time</b> | <b>Retention<br/>Preference</b> | <b>Training<br/>Preference</b> |
|------------------------------|---------------------------------|------------------------|--------------------------------|---------------------------------|--------------------------------|
| <i>g_Bifidobacterium</i>     | 0.220                           | 0.268                  | 0.003                          | 0.0001                          | 0.052                          |
| <i>f_Coriobacteriaceae</i>   | 0.104                           | 0.717                  | 0.381                          | 0.107                           | 0.013                          |
| <i>g_Adlercreutzia</i>       | 0.397                           | 0.597                  | 0.735                          | 0.404                           | 0.010                          |
| <i>o_Bacteroidales</i>       | 0.586                           | 0.314                  | 0.246                          | 0.045                           | 0.789                          |
| <i>g_Bacteroides</i>         | 0.436                           | 0.049                  | 0.054                          | 0.040                           | 0.514                          |
| <i>g_Paraprevotella</i>      | 0.611                           | 0.958                  | 0.295                          | 0.011                           | 0.071                          |
| <i>g_Prevotella</i>          | 0.778                           | 0.279                  | 0.135                          | 0.027                           | 0.354                          |
| <i>g_Rikenella</i>           | 0.995                           | 0.531                  | 0.878                          | 0.042                           | 0.575                          |
| <i>g_Mucispirillum</i>       | 0.328                           | 0.383                  | 0.625                          | 0.094                           | 0.035                          |
| <i>g_Lactobacillus</i>       | 0.139                           | 0.276                  | 0.097                          | 0.010                           | 0.046                          |
| <i>g_Streptococcus</i>       | 0.050                           | 0.578                  | 0.667                          | 0.055                           | 0.001                          |
| <i>g_Clostridium</i>         | 0.192                           | 0.937                  | 0.321                          | 0.046                           | 0.367                          |
| <i>g_Dahalobacterium</i>     | 0.589                           | 0.348                  | 0.089                          | 0.028                           | 0.921                          |
| <i>g_Dorea</i>               | 0.040                           | 1                      | 0.104                          | 0.000                           | 0.055                          |
| <i>g_Lachnospira</i>         | 0.494                           | 0.429                  | 0.746                          | 0.042                           | 0.199                          |
| <i>f_Ruminococcaceae</i>     | 0.859                           | 0.042                  | 0.061                          | 0.193                           | 0.407                          |
| <i>g_Allobaculum</i>         | 0.152                           | 0.209                  | 0.003                          | 0.003                           | 0.005                          |
| <i>c_Alphaproteobacteria</i> | 0.886                           | 0.223                  | 0.026                          | 0.128                           | 0.202                          |
| <i>f_Desulfovibrionaceae</i> | 0.097                           | 0.188                  | 0.007                          | 0.000                           | 0.122                          |
| <i>g_Edwadsia</i>            | 0.049                           | 0.467                  | 0.442                          | 0.334                           | 0.997                          |
| <i>g_Anaeroplasm</i>         | 0.163                           | 0.491                  | 0.237                          | 0.005                           | 0.767                          |
| <i>g_Akkermansia</i>         | 0.847                           | 0.592                  | 0.266                          | 0.031                           | 0.060                          |

Note: Nov: novel-object localization, MA: Motor activity represents significant differences ( $p < 0.05$ )
