# Supplementary material for: Chronic-Antibiotics Induced Gut Microbiota Dysbiosis Rescues Memory Impairment and Reduces β-Amyloid Aggregation in a Preclinical Alzheimer’s Disease Model
Source: MDPI journal article supplement (doi:10.3390/ijms23158209), 2022-07-26
Supplement: s1 [file s1]

**Supplementary Table S1. Sequencing summary.**

| Group                | Number of reads | Reads mean per sample | Reads min-max   | Length means   | Total ASVs counts |
|----------------------|-----------------|-----------------------|-----------------|----------------|-------------------|
| <b>F0 at GD18-19</b> |                 |                       |                 |                |                   |
| NoTg-Ctrl            | 122,771         | 20,461 ± 9,45         | 8,873 - 32,242  | 174.67 ± 4.46  | 79,954            |
| NoTg-Abx             | 285,332         | 71,333 ± 36581        | 28,540 - 17,980 | 187 ± 1.63     | 257,575           |
| 3xTg-Ctrl            | 252,544         | 31,568 ± 15,374       | 14,757 - 55,413 | 174.25 ± 5.42  | 217,007           |
| 3xTg-Abx             | 255,307         | 31,913 ± 22,702       | 3,797 - 69,190  | 182.875 ± 5.81 | 226,750           |
| <b>F1 PD 30</b>      |                 |                       |                 |                |                   |
| NoTg-Ctrl            | 303,937         | 30,393 ± 23484        | 5876 - 84,662   | 172.1 ± 6.57   | 257,206           |
| NoTg-Abx             | 552,382         | 55,238 ± 20102        | 21769 - 82,329  | 181 ± 6.02     | 448,468           |
| 3xTg-Ctrl            | 23,2010         | 23,201 ± 14421        | 8330 - 56,743   | 175.3 ± 4.19   | 196,056           |
| 3xTg Abx             | 34,1234         | 42654 ± 10298         | 23419 - 54,525  | 186.5 ± 1.77   | 302,518           |
| <b>F1 PD 150</b>     |                 |                       |                 |                |                   |
| NoTg-Ctrl            | 811,364         | 81,136 ± 44258        | 5,373 - 121,223 | 180 ± 7.06     | 247,542           |
| NoTg-Abx             | 295,864         | 29,586 ± 20430        | 12,100 - 81,839 | 168.2 ± 7.83   | 694,128           |
|                      | 349,078         | 38,786 ± 27912        | 3,408 - 78,334  | 173.44 ± 5.66  | 293,893           |
| 3xTg-Ctrl            |                 |                       |                 |                |                   |
| 3xTg-Abx             | 324,969         | 46,424 ± 29300        | 15,250- 92,674  | 182.29 ± 8.94  | 278,715           |

*\*Summary of sequencing after trimming at 200 nt.*

Total of raw read sequences: 3,315,428; Total Mean lengths expressed as bases: 177 ± 8. Identified ASVs: 882, Total ASV counts: 3,499,812.
