# Supplementary material for: Chronic-Antibiotics Induced Gut Microbiota Dysbiosis Rescues Memory Impairment and Reduces β-Amyloid Aggregation in a Preclinical Alzheimer’s Disease Model
Source: MDPI journal article supplement (doi:10.3390/ijms23158209), 2022-07-26
Supplement: s1 [file s1]

**Supplementary Table S3. Alpha-diversity indexes of fecal samples from NoTg and 3xTg mice.**

| <b>F0 at GD18-19</b>       |                  |                  |                 |
|----------------------------|------------------|------------------|-----------------|
| <b>Index</b>               | <b>NoTg-Ctrl</b> | <b>NoTg-Abx</b>  | <b>p- value</b> |
| <sup>a</sup> Chao1 index   | 103.40 ± 49.81   | 15.50 ± 6.61     | 0.014           |
| <sup>b</sup> Shannon index | 0.36 ± 0.36      | 0.91 ± 0.16      | 0.014           |
| <sup>b</sup> Simpson index | 0.92 ± 0.03      | 0.39 ± 0.08      | 0.016           |
|                            | <b>3xTg-Ctrl</b> | <b>3xTg-Abx</b>  |                 |
| <sup>a</sup> Chao1 index   | 125.63 ± 68.41   | 12.63 ± 8.14     | < 0.001         |
| <sup>b</sup> Shannon index | 3.85 ± 0.26      | 0.89 ± 0.40      | < 0.001         |
| <sup>b</sup> Simpson index | 0.96 ± 0.01      | 0.40 ± 0.15      | < 0.001         |
| <b>F1 at PD 30</b>         |                  |                  |                 |
|                            | <b>NoTg Ctrl</b> | <b>NoTg Abx</b>  |                 |
| <sup>a</sup> Chao1 index   | 1055.31 ± 219.18 | 12.5 ± 2.37      | < 0.001         |
| <sup>b</sup> Shannon index | 4.30 ± 0.22      | 1.06 ± 0.17      | < 0.001         |
| <sup>b</sup> Simpson index | 0.96 ± 0.01      | 0.46 ± 0.08      | < 0.001         |
|                            | <b>3xTg Ctrl</b> | <b>3xTg Abx</b>  |                 |
| <sup>a</sup> Chao1 index   | 98.90 ± 46.29    | 13.63 ± 1.65     | < 0.001         |
| <sup>b</sup> Shannon index | 3.51 ± 0.69      | 0.95 ± 0.13      | < 0.001         |
| <sup>b</sup> Simpson index | 0.92 ± 0.09      | 0.40 ± 0.06      | < 0.001         |
| <b>F1 at PD 150</b>        |                  |                  |                 |
|                            | <b>NoTg Ctrl</b> | <b>NoTg Abx</b>  |                 |
| <sup>a</sup> Chao1 index   | 1055 ± 219.18    | 1018.65 ± 344.21 | < 0.001         |
| <sup>b</sup> Shannon index | 4.30 ± 0.22      | 3.98 ± 0.54      | < 0.001         |
| <sup>b</sup> Simpson index | 0.96 ± 0.01      | 0.94 ± 0.05      | < 0.001         |
|                            | <b>3xTg Ctrl</b> | <b>3xTg Abx</b>  |                 |
| <sup>a</sup> Chao1 index   | 100.22 ± 53.05   | 31.14 ± 32.86    | < 0.001         |
| <sup>b</sup> Shannon index | 3.47 ± 0.52      | 1.75 ± 1.24      | 0.042           |
| <sup>b</sup> Simpson index | 0.93 ± 0.04      | 0.59 ± 0.25      | 0.012           |

Data shows the Mean ± standard deviation as indicated (see Figs. x and x). The *p*-values were calculated using Mann-Whitney U test comparing data of Ctrl vs. Abx in NoTg and 3xTg mouse in mothers (F0) and offspring (F1). *p* < 0.05 are considered statistically significant.
