# Supplementary material for: Chronic-Antibiotics Induced Gut Microbiota Dysbiosis Rescues Memory Impairment and Reduces β-Amyloid Aggregation in a Preclinical Alzheimer’s Disease Model
Source: MDPI journal article supplement (doi:10.3390/ijms23158209), 2022-07-26
Supplement: s1 [file s1]

**Supplementary Table 6. Spearman Correlation *p* values for immunohistochemistry data in F1 3xTg mice at PD150.**

| <b>Bacteria</b>        | <b>Total <math>\beta</math>A<br/>area in<br/><i>subiculum</i></b> | <b>Total<br/><math>\beta</math>A<br/>area<br/>in<br/>CA3</b> | <b>Total<br/><math>\beta</math>A area<br/>in CA1</b> | <b><math>\beta</math>A1-42<br/>area in<br/><i>subiculum</i></b> | <b><math>\beta</math>A1-<br/>42<br/>area<br/>in<br/>CA3</b> | <b><math>\beta</math>A1-<br/>42<br/>area<br/>in<br/>CA1</b> |
|------------------------|-------------------------------------------------------------------|--------------------------------------------------------------|------------------------------------------------------|-----------------------------------------------------------------|-------------------------------------------------------------|-------------------------------------------------------------|
| f_Lachnospiraceae      | 0.037                                                             | 0.162                                                        | 0.096                                                | 0.027                                                           | 0.027                                                       | 0.470                                                       |
| f_Rikenellaceae_g_AF12 | 0.037                                                             | 0.162                                                        | 0.096                                                | 0.027                                                           | 0.027                                                       | 0.470                                                       |
| g_Clostridium          | 0.078                                                             | 0.188                                                        | 0.062                                                | 0.019                                                           | 0.019                                                       | 0.280                                                       |
| f_Desulfovibrionaceae  | 0.068                                                             | 0.162                                                        | 0.213                                                | 0.028                                                           | 0.010                                                       | 0.483                                                       |
| g_Oscillospira         | 0.186                                                             | 0.302                                                        | 0.524                                                | 0.091                                                           | 0.048                                                       | 0.742                                                       |
| o_Bacteroidales        | 0.444                                                             | 0.406                                                        | 0.608                                                | 0.129                                                           | 0.048                                                       | 0.483                                                       |
| g_Prevotella           | 0.220                                                             | 0.170                                                        | 0.194                                                | 0.016                                                           | 0.016                                                       | 0.170                                                       |
| g_Streptococcus        | 0.162                                                             | 0.526                                                        | 0.122                                                | 0.039                                                           | 0.225                                                       | 0.685                                                       |
| g_Paraprevotella       | 0.261                                                             | 0.577                                                        | 0.078                                                | 0.027                                                           | 0.192                                                       | 0.429                                                       |
| g_Parabacteroides      | 0.429                                                             | 0.651                                                        | 0.280                                                | 0.049                                                           | 0.162                                                       | 0.513                                                       |
| g_Bacteroides          | 0.247                                                             | 0.091                                                        | 0.170                                                | 0.050                                                           | 0.194                                                       | 0.108                                                       |
| g_Ruminococcus         | 0.027                                                             | 0.122                                                        | 0.122                                                | 0.319                                                           | 0.122                                                       | 0.912                                                       |
| g_Dorea                | 0.027                                                             | 0.122                                                        | 0.526                                                | 0.319                                                           | 0.122                                                       | 0.912                                                       |
| g_Anaeroplasm          | 0.027                                                             | 0.122                                                        | 0.526                                                | 0.319                                                           | 0.122                                                       | 0.912                                                       |
| g_Turicibacter         | 0.039                                                             | 0.078                                                        | 0.577                                                | 0.406                                                           | 0.078                                                       | 0.912                                                       |
| g_Lactobacillus        | 0.050                                                             | 0.050                                                        | 0.444                                                | 0.091                                                           | 0.050                                                       | 0.601                                                       |
| g_Klebsiella           | 0.096                                                             | 0.019                                                        | 0.062                                                | 0.019                                                           | 0.019                                                       | 0.188                                                       |
| g_Enterobacter         | 0.140                                                             | 0.068                                                        | 0.162                                                | 0.038                                                           | 0.006                                                       | 0.335                                                       |
| f_F16.g                | 0.188                                                             | 0.027                                                        | 0.062                                                | 0.162                                                           | 0.188                                                       | 0.019                                                       |
| g_Mycoplasma           | 0.039                                                             | 0.027                                                        | 0.526                                                | 0.027                                                           | 0.027                                                       | 0.027                                                       |
| f_Enterobacteriaceae.  | 0.019                                                             | 0.008                                                        | 0.188                                                | 0.008                                                           | 0.008                                                       | 0.062                                                       |
| g_Allobaculum          | 0.742                                                             | 0.406                                                        | 0.261                                                | 0.162                                                           | 0.039                                                       | 0.078                                                       |
| g_Sutterella           | 0.040                                                             | 0.035                                                        | 0.011                                                | 0.003                                                           | 0.076                                                       | 0.050                                                       |

Note: immunohistochemistry data of area occupied for total- and 1-42  $\beta$ A in the *subiculum*, CA1, and CA3. *p*-value < 0.05 were considered significant.
