# Supplementary material for: Chronic-Antibiotics Induced Gut Microbiota Dysbiosis Rescues Memory Impairment and Reduces β-Amyloid Aggregation in a Preclinical Alzheimer’s Disease Model
Source: MDPI journal article supplement (doi:10.3390/ijms23158209), 2022-07-26
Supplement: s1 [file s1]

**Supplementary Table 4. Linear discriminant analysis (LDA) scores were computed for bacterial differentially abundant (order, family, and genus).**

| Bacteria                                 | LDA    | p- value | q-value |
|------------------------------------------|--------|----------|---------|
| <b>F0 3xTg-Ctrl</b>                      |        |          |         |
| f_S24-7                                  | 5.5629 | 0.0005   | 0.0051  |
| g_Lactobacillus                          | 3.3776 | 0.0043   | 0.0282  |
| g_Odoribacter                            | 3.8558 | 0.0011   | 0.0084  |
| g_Clostridium                            | 3.9208 | 0.0011   | 0.0084  |
| g_Bacteroides                            | 4.9983 | 0.0003   | 0.0034  |
| o_Clostridiales                          | 4.9646 | 0.0003   | 0.0034  |
| f_Lachnospiraceae                        | 4.7685 | 0.0003   | 0.0034  |
| g_Paraprevotella                         | 4.3644 | 0.0003   | 0.0034  |
| f_Rikenellaceae                          | 4.2801 | 0.0003   | 0.0034  |
| f_Paraprevotellaceae_g_Prevotella        | 4.7645 | 0.0003   | 0.0034  |
| f_Ruminococcaceae                        | 4.1134 | 0.0003   | 0.0034  |
| f_Prevotellaceae_g_Prevotella            | 4.7275 | 0.0003   | 0.0034  |
| g_Oscillospira                           | 4.0017 | 0.0037   | 0.0261  |
| g_Dehalobacterium                        | 2.6281 | 0.0272   | 0.1668  |
| o_Bacteroidales                          | 4.4661 | 0.0011   | 0.0084  |
| <b>F0 3xTg-Abx at PD30</b>               |        |          |         |
| f_Enterobacteriaceae                     | 3.6351 | 0.0272   | 0.6256  |
| g_Klebsiella                             | 4.9506 | 0.0006   | 0.0322  |
| g_Sutterella                             | 4.6674 | 0.0100   | 0.3066  |
| g_Enterobacter                           | 5.8677 | 0.0007   | 0.0322  |
| <b>F1 3xTg-Ctrl at PD30</b>              |        |          |         |
| f_S24 7                                  | 5.5646 | 0.0002   | 0.0046  |
| f_Rikenellaceae_g_AF12                   | 3.4837 | 0.0110   | 0.0532  |
| g_Lactobacillus                          | 4.9443 | 0.0002   | 0.0046  |
| g_Parabacteroides                        | 3.3236 | 0.0245   | 0.0980  |
| g_Streptococcus                          | 3.6290 | 0.0245   | 0.0980  |
| g_Bacteroides                            | 5.0075 | 0.0002   | 0.0046  |
| o_Clostridiales                          | 4.7971 | 0.0009   | 0.0111  |
| g_Prevotella                             | 4.5567 | 0.0017   | 0.0111  |
| f_Ruminococcaceae_g_Ruminococcus         | 3.3869 | 0.0017   | 0.0111  |
| f_Lachnospiraceae_g_Ruminococcus         | 3.6134 | 0.0017   | 0.0111  |
| f_Desulfovibrionaceae                    | 3.3822 | 0.0017   | 0.0111  |
| f_Rikenellaceae                          | 4.4614 | 0.0002   | 0.0046  |
| f_Lachnospiraceae                        | 4.5938 | 0.0009   | 0.0110  |
| f_Ruminococcaceae                        | 3.9310 | 0.0046   | 0.0248  |
| g_Odoribacter                            | 3.8225 | 0.0046   | 0.0248  |
| g_Prevotella                             | 4.5770 | 0.0006   | 0.0110  |
| f_Clostridiaceae_g_CandidatusArthromitus | 3.8482 | 0.0110   | 0.0532  |
| f_Erysipelotrichaceae                    | 3.1710 | 0.0017   | 0.0111  |
| g_Oscillospira                           | 4.1941 | 0.0017   | 0.0111  |
| o_Bacteroidales                          | 3.3253 | 0.0017   | 0.0111  |
| g_Flexispira                             | 3.5329 | 0.0245   | 0.0980  |
| f_Helicobacteraceae                      | 3.3771 | 0.0046   | 0.2948  |
| g_Coprobacillus                          | 2.8083 | 0.0245   | 0.0980  |
| f_Rikenellaceae_g_AF12                   | 3.4837 | 0.0110   | 0.0532  |

| F1 3xTg-Abx at PD30                             |        |        |        |
|-------------------------------------------------|--------|--------|--------|
| <i>g_Mycoplasma</i>                             | 3.1694 | 0.0128 | 0.2940 |
| <i>g_Klebsiella</i>                             | 5.0103 | 0.0029 | 0.0889 |
| <i>g_Sutterella</i>                             | 4.8105 | 0.0005 | 0.0230 |
| <i>g_Enterobacter</i>                           | 5.8821 | 0.0002 | 0.0184 |
| F1 NoTg-Ctrl at PD30                            |        |        |        |
| <i>o_Bacteroidales_f_S24_7</i>                  | 5.5400 | 0.0000 | 0.0000 |
| <i>g_Lactobacillus</i>                          | 3.8395 | 0.0001 | 0.0010 |
| <i>g_Parabacteroides</i>                        | 3.5146 | 0.0305 | 0.1476 |
| <i>g_Bacteroides</i>                            | 4.7280 | 0.0000 | 0.0000 |
| <i>o_Clostridiales</i>                          | 5.0571 | 0.0000 | 0.0000 |
| <i>g_Prevotella</i>                             | 4.2382 | 0.0051 | 0.0335 |
| <i>f_Lachnospiraceae_g_Ruminococcus</i>         | 3.6263 | 0.0006 | 0.0050 |
| <i>f_Ruminococcaceae_g_Ruminococcus</i>         | 3.6501 | 0.0130 | 0.0747 |
| <i>f_Rikenellaceae</i>                          | 5.0976 | 0.0000 | 0.0000 |
| <i>f_Lachnospiraceae</i>                        | 4.3621 | 0.0000 | 0.0000 |
| <i>g_Edwardsiella</i>                           | 4.1715 | 0.0130 | 0.0747 |
| <i>f_Ruminococcaceae</i>                        | 4.1587 | 0.0001 | 0.0010 |
| <i>g_Prevotella</i>                             | 4.6131 | 0.0000 | 0.0000 |
| <i>c_Alphaproteobacteria</i>                    | 3.4730 | 0.0051 | 0.0335 |
| <i>f_Clostridiaceae_g_CandidatusArthromitus</i> | 3.8461 | 0.0019 | 0.0145 |
| <i>f_Erysipelotrichaceae</i>                    | 2.9173 | 0.0305 | 0.1476 |
| <i>g_Oscillospira</i>                           | 4.2932 | 0.0000 | 0.0000 |
| <i>g_Dehalobacterium</i>                        | 2.542  | 0.0305 | 1.0000 |
| <i>o_Bacteroidales</i>                          | 4.0835 | 0.0006 | 0.0050 |
| <i>g_Flexispira</i>                             | 2.9978 | 0.0305 | 0.0145 |
| F1 3xTg-Ctrl at PD150                           |        |        |        |
| <i>o_Bacteroidales_f_S24_7</i>                  | 5.5248 | 0.0468 | 0.2443 |
| <i>f_Rikenellaceae_g_AF12</i>                   | 3.4295 | 0.0150 | 0.1533 |
| <i>g_Lactobacillus</i>                          | 4.4110 | 0.0276 | 0.2116 |
| <i>g_Odoribacter</i>                            | 3.6578 | 0.0234 | 0.2032 |
| <i>g_Dorea</i>                                  | 4.3169 | 0.0106 | 0.1393 |
| <i>g_Clostridium</i>                            | 3.8163 | 0.0023 | 0.0705 |
| <i>g_Allobaculum</i>                            | 4.7245 | 0.0364 | 0.2232 |
| <i>o_Clostridiales</i>                          | 5.0991 | 0.0090 | 0.1393 |
| <i>f_Lachnospiraceae</i>                        | 4.5570 | 0.0023 | 0.0703 |
| <i>g_Paraprevotella</i>                         | 3.5331 | 0.0243 | 0.2032 |
| <i>f_Desulfovibrionaceae</i>                    | 3.9334 | 0.0034 | 0.0782 |
| <i>f_Rikenellaceae</i>                          | 4.4931 | 0.0015 | 0.0705 |
| <i>g_Ruminococcus</i>                           | 3.4270 | 0.0106 | 0.1393 |
| <i>f_Ruminococcaceae</i>                        | 3.9809 | 0.0361 | 0.2232 |
| <i>g_Bifidobacterium</i>                        | 4.3100 | 0.0309 | 0.2186 |
| <i>g_Prevotella</i>                             | 4.8369 | 0.0468 | 0.2443 |
| <i>g_Oscillospira</i>                           | 4.0087 | 0.0124 | 0.1426 |
| <i>f_Helicobacteraceae</i>                      | 3.9994 | 0.0478 | 0.2443 |
| F1 3xTg-Abx at PD150                            |        |        |        |
| <i>g_Mycoplasma</i>                             | 3.5450 | 0.0123 | 0.2829 |
| <i>f_Enterobacteriaceae</i>                     | 3.9462 | 0.0412 | 0.7580 |
| <i>g_Klebsiella</i>                             | 4.7940 | 0.0089 | 0.2760 |
| <i>g_Sutterella</i>                             | 4.7879 | 0.0035 | 0.2760 |
| <i>g_Enterobacter</i>                           | 5.7191 | 0.0090 | 0.2760 |

| F1 NoTg-Ctrl at PD150     |        |        |        |
|---------------------------|--------|--------|--------|
| o__Bacteroidales_f__S24_7 | 5.5223 | 0.0000 | 0.0000 |
| g__Coprococcus            | 2.9091 | 0.0305 | 0.1753 |
| f__Rikenellaceae_g__AF12  | 3.3451 | 0.0359 | 0.1942 |
| g__Lactobacillus          | 4.7896 | 0.0000 | 0.0000 |
| g__Clostridium            | 3.8841 | 0.0305 | 0.1753 |
| g__Bacteroides            | 3.8112 | 0.0016 | 0.0184 |
| o__Clostridiales          | 5.1807 | 0.0003 | 0.0046 |
| g__Prevotella             | 4.5118 | 0.0001 | 0.0023 |
| g__Ruminococcus           | 3.4279 | 0.0450 | 0.2300 |
| g__Ruminococcus_          | 3.7308 | 0.0118 | 0.0904 |
| f__Rikenellaceae          | 4.5612 | 0.0003 | 0.0046 |
| f__Lachnospiraceae        | 4.7433 | 0.0011 | 0.0144 |
| f__Ruminococcaceae        | 3.9085 | 0.0037 | 0.0377 |
| g__Odoribacter            | 3.8747 | 0.0081 | 0.6774 |
| g__Prevotella             | 4.5482 | 0.0000 | 0.0000 |
| f__Erysipelotrichaceae    | 2.8093 | 0.0305 | 0.1753 |
| g__Oscillospira           | 3.9837 | 0.0041 | 0.0372 |
| g__Mycoplasma             | 2.6120 | 0.0130 | 0.0920 |
| F1 NoTg-Abx at PD150      |        |        |        |
| f__Enterobacteriaceae     | 4.4381 | 0.0000 | 0.0000 |
| g__Klebsiella             | 4.7965 | 0.0000 | 0.0000 |
| g__Sutterella             | 5.0282 | 0.0001 | 0.0030 |
| g__Enterobacter           | 5.8133 | 0.0001 | 0.0023 |

The threshold on the logarithmic LDA score was set to 2.5.  $p$  and  $q$  values  $< 0.05$  were considered statistically significant. \* $p$ -value was adjusted with Benjamini-Hochberg method and generated FDR value ( $q$ -value). The name of each taxon level appears in abbreviation before its taxon. “f”, family; “g”, genus. “LDA” Linear discriminant analysis.
