# Supplementary material for: Chronic-Antibiotics Induced Gut Microbiota Dysbiosis Rescues Memory Impairment and Reduces β-Amyloid Aggregation in a Preclinical Alzheimer’s Disease Model
Source: MDPI journal article supplement (doi:10.3390/ijms23158209), 2022-07-26
Supplement: s1 [file s1]

**Supplementary Table S2. Relative abundance of fecal samples from NoTg and 3xTg mice.**

| <b>F0 at GD18-19</b> | <b>NoTg Ctrl</b> | <b>NoTg Abx</b> | <b><i>p</i>- value</b> |
|----------------------|------------------|-----------------|------------------------|
| Proteobacteria       | 20.44 ± 0.43     | 75.53 ± 0.42    | 0.074                  |
| Bacteroidetes        | 42.99 ± 0.28     | 14.14 ± 0.31    | 0.092                  |
| Firmicutes           | 29.32 ± 0.22     | 4.81 ± 0.10     | 0.065                  |
| Actinobacteria       | 0.01 ± 0.00      | 0.27 ± 0.03     | 0.058                  |
| Others               | 1.03 ± 0.06      | 0.75 ± 0.00     | 0.714                  |
|                      | <b>3xTg Ctrl</b> | <b>3xTg Abx</b> | <b><i>p</i>- value</b> |
| Proteobacteria       | 4.17 ± 0.02      | 87.15 ± 0.21    | <0.0001                |
| Bacteroidetes        | 68.84 ± 0.11     | 0.04 ± 0.00     | <0.0001                |
| Firmicutes           | 21.46 ± 0.09     | 0.22 ± 0.00     | <0.0001                |
| Actinobacteria       | 0.01 ± 0.00      | 0.08 ± 0.00     | 0.3501                 |
| Others               | 1.36 ± 0.04      | 4.17 ± 0.02     | 0.580                  |
| <b>F1at PD30</b>     | <b>NoTg Ctrl</b> | <b>NoTg Abx</b> | <b><i>p</i>- value</b> |
| Proteobacteria       | 2.35 ± 0.02      | 90.10 ± 0.05    | <0.0001                |
| Bacteroidetes        | 60.67 ± 0.13     | 0.00 ± 0.00     | <0.0001                |
| Firmicutes           | 19.87 ± 0.09     | 0.00 ± 0.00     | <0.0001                |
| Actinobacteria       | 0.07 ± 0.00      | 0.00 ± 0.00     | 0.1667                 |
| Others               | 17.04 ± 0.06     | 0.90 ± 0.05     | 0.853                  |
|                      | <b>3xTg Ctrl</b> | <b>3xTg Abx</b> | <b><i>p</i>- value</b> |
| Proteobacteria       | 5.01 ± 0.02      | 93.07 ± 1.66    | <0.0001                |
| Bacteroidetes        | 58.93 ± 0.13     | 0.00 ± 0.00     | <0.0001                |
| Firmicutes           | 19.87 ± 0.09     | 0.04 ± 0.08     | <0.0001                |
| Actinobacteria       | 0.07 ± 0.00      | 0.08 ± 0.23     | 0.035                  |
| Others               | 9.75 ± 0.03      | 6.55 ± 0.02     | 0.163                  |
| <b>F1at PD150</b>    | <b>NoTg Ctrl</b> | <b>NoTg Abx</b> | <b><i>p</i>- value</b> |
| Proteobacteria       | 2.27 ± 0.03      | 86.03 ± 0.14    | <0.0001                |
| Bacteroidetes        | 45.55 ± 0.21     | 0.45 ± 0.01     | <0.0001                |
| Firmicutes           | 31.78 ± 0.19     | 3.91 ± 0.11     | 0.0003                 |
| Actinobacteria       | 0.73 ± 0.01      | 0.2 ± 0.00      | 0.7214                 |
| Others               | 19.66 ± 0.08     | 9.41 ± 0.05     | 0.510                  |
|                      | <b>3xTg Ctrl</b> | <b>3xTg Abx</b> | <b><i>p</i>- value</b> |
| Proteobacteria       | 3.51 ± 0.03      | 65.86 ± 0.43    | 0.040                  |
| Bacteroidetes        | 48.90 ± 0.21     | 19.72 ± 0.33    | 0.086                  |
| Firmicutes           | 30.29 ± 0.04     | 3.92 ± 0.06     | 0.001                  |
| Actinobacteria       | 2.30 ± 0.04      | 0.16 ± 0.00     | 0.185                  |
| Others               | 15.00 ± 0.05     | 10.33 ± 0.03    | 0.600                  |

Data shows the Mean ± standard deviation as indicated. The *p*-values were calculated using the Mann-Whitney U test. *p* < 0.05 are considered statistically significant.
