# Supplementary material for: Chronic-Antibiotics Induced Gut Microbiota Dysbiosis Rescues Memory Impairment and Reduces β-Amyloid Aggregation in a Preclinical Alzheimer’s Disease Model
Source: MDPI journal article supplement (doi:10.3390/ijms23158209), 2022-07-26
Supplement: s1 [file s1]

**Table S5. Correlation between bacterial diversity and histological measures and behavioral test in 3xTg at PD150 mice.**

| Parameter                                                            | <i>p</i> -value | r       | R <sup>2</sup> |
|----------------------------------------------------------------------|-----------------|---------|----------------|
| <b>Total- and 1-42 A<math>\beta</math> in the dorsal hippocampus</b> |                 |         |                |
| A $\beta$ 1-42 area in <i>subiculum</i>                              | 0.0179          | 0.7871  | 0.6195         |
| A $\beta$ 1-42 area in CA1                                           | 0.0726          | 0.6108  | 0.3730         |
| A $\beta$ 1-42 area in CA3                                           | 0.0086          | 0.8428  | 0.7103         |
| Total A $\beta$ area in <i>subiculum</i>                             | 0.0012          | 0.9305  | 0.8658         |
| Total A $\beta$ area in CA1                                          | 0.0030          | 0.8985  | 0.8073         |
| Total A $\beta$ area in CA3                                          | 0.0007          | 0.9441  | 0.8914         |
| <b>Novel object localization</b>                                     |                 |         |                |
| NOL_Training_Preference                                              | 0.0633          | -0.3982 | 0.1585         |
| NOL_Retention_Preference                                             | 0.0113          | -0.5648 | 0.3190         |

Pearson correlation coefficients were considered significant with *p* values <0.05.
